# Supplementary material for: Revealing the Impact of Understory Fires on Stem Survival in Five Palm Species (Arecaceae): An Experimental Approach Using Predictive Models
Source: Preprints.org preprint supplement (doi:10.20944/preprints202407.0087.v1), 2024-07-01
Supplement: Supplementary file 1 [file supplementary]

## Sheet: COMPLETE_variables
COUNT	fire_ref	hora	data	especie	par	das	V1	V2	V3	V4	V5	fase	htot	hqestipe	hsensorg	pestipe	compfolha	nf	qfolha	pfolha1	pfolha2	pfolha3	pfolha4	pfolha5	perda1	perda2	perda3	perda4	perda5	nrebrt1	nrebrt2	nrebrt3	nrebrt4	nrebrt5	hrebrt1	hrebrt2	hrebrt3	hrebrt4	hrebrt5	destin5	kbrote	folnova5	fcresc	dasdap	htotdas	dap	tempo	tmaxb	tmediab
117	F118	14:28:00.019000	41530	Bactris maraja	B2	1.6	0	0	28	77	137	A	99	80	172	0.465116	105	8	0.875	0	0	1	1	1	0	0	0.25	1	0.875	0	0	0	1	2	0	0	0	24	53	RC	0.761834	0	PP	0.888889	61.875	1.8	481	474.3	105.13
160	F162	12:49:59.981000	41548	Bactris maraja	B4	1.6	0	0	10	59	119	A	400	58	143	0.405594	140	6	1	0	0	0.166667	1	1	0	0	0.166667	1	1	0	0	0	0	1	0	0	0	0	31	RB	0.761834	0	PP	0.4	250	4	480	702.9	117.13
5	F05	16:50:00.010000	41492	Bactris maraja	D1	2	16	31	66	115	175	A	250	98	128	0.765625	210	8	1	0.0625	0.0625	1	1	1	0.0625	0.0625	1	1	1	0	0	0	0	2	0	0	0	0	57	RB	0.761834	0	PP	0.8	125	2.5	741	267.1	87.3136
99	F100	14:37:00.019000	41524	Bactris maraja	B1	1.4	0	0	34	83	143	A	180	46	72	0.638889	102	6	1	0	0	1	1	1	0	0	1	1	1	0	0	0	1	1	0	0	0	3.4	25.3	RB	0.761834	0	PP	0.875	128.571	1.6	480	615.7	196.219
144	F146	16:18:00.029000	41534	Bactris maraja	B3	1.8	0	0	24	73	133	A	200	80	78	1.02564	130	4	1	0	0	1	1	1	0	0	1	1	1	0	0	0	1	1	0	0	0	21	38	RB	0.761834	0	PP	1.125	111.111	1.6	479	321.5	85.2078
97	F97	13:54:59.990000	41524	Bactris maraja	B1	1.3	0	0	34	83	143	J	160	51	91	0.56044	90	6	1	0	0	1	1	1	0	0	1	1	1	0	0	0	1	1	0	0	0	19	53	RB	0.761834	0	PP	1.3	123.077	1	480	366.1	125.539
23	F23	16:48:00	41500	Bactris maraja	E3	2	8	23	58	107	167	A	290	49	171	0.28655	145	8	1	0.125	0.125	0.3125	0.5	1	0.125	0.125	0.8125	1	1	0	0	0	2	6	0	0	0	15.5	48.5	RB	0.761834	0	PP	1.11111	145	1.8	368	591	126.68
134	F136	14:26:00.010000	41534	Bactris maraja	B3	2.3	0	0	24	73	133	A	200	82	92	0.891304	170	2	1	0	0	0.5	1	1	0	0	1	1	1	0	0	0	0	0	0	0	0	0	0	M	0.761834	0	PP	1.27778	86.9565	1.8	480	95.3	48.5573
75	F75	16:39:00	41515	Bactris maraja	D2	1.8	0	8	43	92	152	J	300	100	191	0.52356	250	7	1	0	0.285714	1	1	1	0	0.285714	1	1	1	0	0	0	0	0	0	0	0	0	0	M	0.761834	0	PP	1.63636	166.667	1.1	480	366.1	81.5141
60	F60	13:48:59.962000	41515	Bactris maraja	D2	2	0	8	43	92	152	A	230	39	160	0.24375	134	7	1	0	0.357143	1	1	1	0	0.357143	1	1	1	0	0	0	0	2	0	0	0	0	36	RB	0.761834	0	PP	1.42857	115	1.4	480	492.2	95.7512
138	F140	15:15:59.990000	41534	Bactris maraja	B3	1.9	0	0	24	73	133	J	265	73	130	0.561538	172	6	0.5	0	0	0.333333	1	0.5	0	0	0.666667	1	0.5	0	0	0	0	0	0	0	0	0	0	V	0	0	PP	1.1875	139.474	1.6	479	273.9	65.5066
54	F54	15:17:00.038000	41514	Bactris maraja	D4	1.4	0	9	44	93	153	A	200	41	150	0.273333	170	4	1	0	0	1	1	1	0	0	1	1	1	0	0	1	1	0	0	0	41	66	0	RM	0.761834	0	PP	1	142.857	1.4	481	288.1	87.7693
123	F124	15:40:00.019000	41530	Bactris maraja	B2	2	0	0	28	77	137	A	139	27	55	0.490909	118	3	1	0	0	1	1	1	0	0	1	1	1	0	0	0	0	2	0	0	0	0	92	RB	0.761834	0	PP	0.714286	69.5	2.8	480	555.7	162.151
101	F102	15:04:00.019000	41524	Bactris maraja	B1	1.7	0	0	34	83	143	A	180	38	75	0.506667	90	4	1	0	0	1	1	1	0	0	1	1	1	0	0	0	1	2	0	0	0	29.5	51.5	RB	0.761834	0	PP	1.0625	105.882	1.6	481	352.2	121.472
14	F14	14:46:00.019000	41500	Chamaedora pauciflora	E3	1.6	8	23	58	107	167	J	120	34	150	0.226667	59	6	1	0	0.333333	1	1	1	0	0.333333	1	1	1	0	0	0	1	0	0	0	0	9	0	RM	0.454545	0	PP	0.888889	75	1.8	363	328.5	144.175
29	F29	13:52:59.981000	41506	Chamaedora pauciflora	D3	1.8	2	17	52	101	161	A	240	42	165	0.254545	60	8	1	0	0	1	1	1	0	0	1	1	1	0	0	0	2	3	0	0	0	22	28	RB	0.454545	0	PP	1.38461	133.333	1.3	482	117.3	63.3399
81	F81	13:57:59.962000	41519	Chamaedora pauciflora	D6	1.7	0	4	39	88	148	A	156	80	134	0.597015	87	7	1	0	0	0	1	1	0	0	0	1	1	0	0	0	0	0	0	0	0	0	0	M	0.454545	0	PP	1	91.7647	1.7	481	596.2	105.963
80	F80	13:43:59.981000	41519	Chamaedora pauciflora	D6	1.7	0	4	39	88	148	A	110	63	93	0.677419	72	10	1	0	0	0	1	1	0	0	0	1	1	0	0	0	0	2	0	0	0	0	9	RB	0.454545	0	PP	0.944444	64.7059	1.8	482	429	148.665
27	F27	13:39:59.962000	41506	Chamaedora pauciflora	D3	2.7	2	17	52	101	161	A	200	37	139	0.266187	100	8	1	0.0625	0.875	1	1	1	0.0625	0.875	1	1	1	0	0	0	0	0	0	0	0	0	0	M	0.454545	0	PP	2.07692	74.0741	1.3	482	429.3	139.662
88	F88	15:20:59.971000	41519	Chamaedora pauciflora	D6	2.1	0	4	39	88	148	J	90	30	39	0.769231	76	4	1	0	0	1	1	1	0	0	1	1	1	0	0	0	0	1	0	0	0	0	14.5	RB	0.454545	0	PP	1.10526	0	1.9	481	487.5	106.461
129	F131	18:20:59.971000	41534	Chamaedora pauciflora	B3	0	0	0	24	73	133	J	150	15	0	0.75	78	4	1	0	0	1	1	1	0	0	1	1	1	0	0	0	0	1	0	0	0	0	81	RB	0.454545	0	PP	0	0	2	360	337.9	92.7402
82	F82	14:10:00.019000	41519	Chamaedora pauciflora	D6	1.6	0	4	39	88	148	A	210	31	180	0.172222	106	6	1	0	0	0	0.416667	1	0	0	0	0.416667	1	0	0	0	0	0	0	0	0	0	0	M	0.454545	0	PP	0.432432	131.25	3.7	480	636.7	111.39
59	F59	13:38:00.038000	41515	Chamaedora pauciflora	D2	2	0	8	43	92	152	A	135	30	0	0	160	12	1	0	0.208333	1	1	1	0	0.208333	1	1	1	0	0	1	1	1	0	0	5	36	49.5	RC	0.454545	0	PP	1.11111	0	1.8	480	461.3	123.234
148	F150	16:57:00	41534	Chamaedora pauciflora	B3	2	0	0	24	73	133	A	110	31	0	1.03333	70	4	1	0	0	1	1	1	0	0	1	1	1	0	0	0	0	0	0	0	0	0	0	M	0.454545	0	PP	1.17647	0	1.7	360	238.1	78.651
174	F176	15:22:59.981000	41548	Chamaedora pauciflora	B4	3.8	0	0	10	59	119	A	120	37	0	0.822222	108	10	1	0	0	0.2	1	1	0	0	1	1	1	0	0	0	0	0	0	0	0	0	0	M	0.454545	0	PP	1.52	0	2.5	370	665.2	171.416
18	F18	15:44:00.038000	41500	Euterpe precatoria	E3	3.5	8	23	58	107	167	JII	300	56	96	0.583333	171	4	1	0.25	0.25	0.375	0.875	1	0.25	0.25	0.375	0.875	1	0	0	0	1	0	0	0	0	5	0	RM	0.196	0	PP	1.34615	85.7143	2.6	361	687.3	141.905
1	F01	12:00:00	41492	Euterpe precatoria	E1	3.8	16	31	66	115	175	JII	310	60	60	0.612245	195	6	0.5	0.166667	0.25	0.25	0.333333	0.5	0.166667	0.25	0.25	0.333333	0.5	0	0	0	0	0	0	0	0	0	0	V	0	0	PP	1.71364	82.2281	2.2	491	586.4	113.332
141	F143	15:53:00.038000	41534	Euterpe precatoria	B3	3	0	0	24	73	133	JII	230	79	99	0.79798	191	3	1	0	0	0.5	1	1	0	0	0.833333	1	1	0	0	0	1	1	0	0	0	8	8	RA	0.196	0	PP	1.57895	76.6667	1.9	480	139.1	60.9873
90	F90	15:47:00.010000	41519	Euterpe precatoria	D6	4.8	0	4	39	88	148	JII	200	88	90	0.977778	197	3	1	0	0	1	1	1	0	0	1	1	1	0	0	0	0	0	0	0	0	0	0	M	0.196	0	PP	2.28571	41.6667	2.1	480	439.8	113.695
149	F151	17:08:59.971000	41534	Euterpe precatoria	B3	5.5	0	0	24	73	133	JII	300	69	197	0.350254	140	7	0.142857	0	0	0	1	0.142857	0	0	0	1	0.142857	0	0	0	0	0	0	0	0	0	0	V	0	0	PP	2.3913	54.5455	2.3	480	245.4	83.1601
36	F36	15:33:59.990000	41506	Euterpe precatoria	D3	3.2	2	17	52	101	161	JII	230	73	80	0.9125	201	4	1	0.375	0.375	1	1	1	0.375	0.875	1	1	1	0	0	0	0	0	0	0	0	0	0	M	0.196	0	PP	0	71.875	0	483	257.2	102.906
12	F12	14:19:59.981000	41500	Euterpe precatoria	E3	1.2	8	23	58	107	167	J	120	33	80	0.4125	132	2	1	0.5	0.5	1	1	1	0.5	1	1	1	1	0	0	0	0	0	0	0	0	0	0	M	0.196	0	PP	1.2	100	1	360	108.6	65.5341
161	F163	13:03:59.962000	41548	Euterpe precatoria	B4	6.1	0	0	10	59	119	JII	400	74	298	0.248322	177	6	0	0	0	0	0	0	0	0	0	0	0	0	0	0	0	0	0	0	0	0	0	V	0	0	PP	1.60526	65.5738	3.8	480	248.5	99.3114
19	F19	15:54:59.962000	41500	Euterpe precatoria	E3	2	8	23	58	107	167	J	250	59	77	0.766234	139	4	1	0.5	0.875	1	1	1	0.5	0.875	1	1	1	0	0	0	0	0	0	0	0	0	0	M	0.196	0	PP	1.11111	125	1.8	364	480.2	110.961
72	F72	16:03:00	41515	Euterpe precatoria	D2	4.5	0	8	43	92	152	JII	300	55	120	0.458333	173	4	0.63	0	0.25	0.5	0.625	1	0	0.25	0.5	0.625	1	0	0	0	0	0	0	0	0	0	0	M	0.196	0	PP	1.95652	66.6667	2.3	481	547.7	97.4629
6	F06	12:51:59.990000	41506	Euterpe precatoria	D3	2.2	2	17	52	101	161	JII	300	64	74	0.864865	130	3	1	0.166667	0.833333	1	1	1	0.166667	0.833333	1	1	1	0	0	1	0	0	0	0	3	0	0	RM	0.196	0	PP	0.956522	136.364	2.3	482	594.9	122.784
147	F149	16:45:59.990000	41534	Euterpe precatoria	B3	5.8	0	0	24	73	133	JII	250	120	177	0.677966	126	5	0.6	0	0	0.6	0.6	0.6	0	0	0.6	0.6	0.6	0	0	0	0	0	0	0	0	0	0	V	0	1	PP	1.87097	43.1034	3.1	480	591	110.262
34	F34	15:08:00.038000	41506	Euterpe precatoria	D3	3.2	2	17	52	101	161	JII	310	49	108	0.453704	264	3	1	0.166667	0.166667	1	1	1	0.166667	0.166667	1	1	1	0	0	1	0	0	0	0	32	0	0	RM	0.196	0	PP	2	96.875	1.6	480	529	141.95
7	F07	13:09:00.029000	41506	Euterpe precatoria	D3	3.1	2	17	52	101	161	J	250	47	98	0.479592	210	5	1	0	0.5	0.6	0.5	1	0	0.7	1	0.5	1	0	0	0	0	0	0	0	0	0	0	M	0.196	0	PP	1.82353	80.6452	1.7	480	327.6	76.5698
16	F16	15:18:00	41500	Euterpe precatoria	E3	2.8	8	23	58	107	167	JII	280	50	92	0.543478	161	5	1	0	0.2	0.3	1	1	0	0.2	0.3	1	1	0	0	0	0	0	0	0	0	0	0	M	0.196	0	PP	1.4	100	2	361	523.2	126.968
33	F33	14:53:00.010000	41506	Euterpe precatoria	D3	5	2	17	52	101	161	JIII	201	93	99	0.939394	253	4	1	0.25	0.375	1	1	1	0.25	0.875	1	1	1	0	0	0	0	1	0	0	0	0	14	RA	0.196	0	PP	1.72414	0	2.9	480	410	119.55
87	F87	15:06:00.029000	41519	Euterpe precatoria	D6	4	0	4	39	88	148	JII	260	73	110	0.663636	230	5	0.8	0	0	0.7	0.8	0.8	0	0	0.7	0.8	0.8	0	0	0	0	1	0	0	0	0	27	RA	0.196	0	PP	1.90476	65	2.1	480	336.4	142.392
26	F26	13:25:59.981000	41506	Euterpe precatoria	D3	4	2	17	52	101	161	JII	360	88	169	0.52071	210	3	0.83	0	0.166667	0.5	0.833333	0.83	0	0.166667	0.5	0.833333	0.83	0	0	0	0	0	0	0	0	0	0	V	0	1	PP	1.6	90	2.5	481	671.8	139.63
170	F172	14:46:00.019000	41548	Euterpe precatoria	B4	4.4	0	0	10	59	119	JII	250	122	240	0.508333	250	5	0.8	0	0	0	0.8	0.8	0	0	0	0.8	0.8	0	0	0	0	1	0	0	0	0	121	RA	0.196	0	PP	1.46667	56.8182	3	483	459.8	126.916
21	F21	16:23:00.010000	41500	Euterpe precatoria	E3	2.6	8	23	58	107	167	JII	310	76	92	0.826087	158	5	1	0.1	0.6	1	1	1	0.1	0.6	1	1	1	0	0	0	0	0	0	0	0	0	0	M	0.196	0	PP	1.23809	119.231	2.1	364	234.7	82.3823
91	F91	15:58:59.981000	41519	Euterpe precatoria	D6	1.8	0	4	39	88	148	J	190	68	68	1	183	3	1	0	0	1	1	1	0	0	1	1	1	0	0	0	0	0	0	0	0	0	0	M	0.196	0	PP	1.05882	0	1.7	481	623.2	193.886
69	F69	15:31:00.019000	41515	Euterpe precatoria	D2	3	0	8	43	92	152	JII	400	69	93	0.741935	145	4	0.5	0	0.25	0.25	0.25	0.5	0	0.25	0.5	0.5	0.5	0	0	1	1	0	0	0	3.5	5	0	V	0	0	PP	1.25	133.333	2.4	481	522.2	141.995
93	F93	16:25:59.981000	41519	Euterpe precatoria	D6	4	0	4	39	88	148	JII	285	73	95	0.768421	210	4	1	0	0	0	1	1	0	0	1	1	1	0	0	0	0	0	0	0	0	0	0	M	0.196	0	PP	2	71.25	2	480	448.1	108.918
119	F120	14:48:59.990000	41530	Euterpe precatoria	B2	2.1	0	0	28	77	137	JII	200	60	51	0.983607	128	5	1	0	0	1	1	1	0	0	1	1	1	0	0	0	0	0	0	0	0	0	0	M	0.196	0	PP	1.16667	95.2381	1.8	480	358.1	101.895
110	F111	15:22:59.981000	41529	Euterpe precatoria	B1	5.5	0	0	29	78	138	JII	230	68	110	0.618182	188	4	0.38	0	0	0.25	0.375	0.38	0	0	0.25	0.375	0.38	0	0	0	0	0	0	0	0	0	0	V	0	0	PP	2.5	41.8182	2.2	481	466.2	79.7679
116	F117	14:15:59.962000	41530	Euterpe precatoria	B2	1.2	0	0	28	77	137	J	45	30	0	1	90	4	1	0	0	1	1	1	0	0	1	1	1	0	0	0	0	0	0	0	0	0	0	M	0.196	0	PP	0.631579	0	1.9	481	242.2	91.8302
139	F141	15:27:00	41534	Euterpe precatoria	B3	1.2	0	0	24	73	133	J	40	30	0	0.75	140	3	1	0	0	1	1	1	0	0	1	1	1	0	0	0	0	0	0	0	0	0	0	M	0.196	0	PP	0.923077	0	1.3	370	274.2	70.9086
131	F133	13:47:00.038000	41534	Geonoma deversa	B3	2.9	0	0	24	73	133	A	400	61	220	0.277273	110	15	0.0666667	0	0	0.033333	1	0.066667	0	0	0.033333	1	0.066667	0	0	0	0	0	0	0	0	0	0	V	0	3	PP	1.31818	137.931	2.2	480	483.9	112.324
137	F139	15:04:00.019000	41534	Geonoma deversa	B3	2.7	0	0	24	73	133	A	380	60	86	0.697674	130	7	1	0	0	0.285714	1	0	0	0	0.714286	1	1	0	0	0	0	1	0	0	0	0	15	RB	1	5	PP	1.03846	140.741	2.6	480	508.1	124.055
166	F168	14:05:00.038000	41548	Geonoma deversa	B4	3.6	0	0	10	59	119	A	380	37	215	0.172093	91	15	0.133333	0	0	0	1	0.133333	0	0	0	1	0.133333	0	0	0	0	0	0	0	0	0	0	V	0	0	PP	1.28571	105.556	2.8	480	155.9	72.0152
135	F137	14:37:59.981000	41534	Geonoma deversa	B3	4.1	0	0	24	73	133	A	44	22	0	0.360656	61	12	1	0	0	0.583333	1	1	0	0	1	1	1	0	0	0	1	1	0	0	0	39	13	RA	1	0	PP	1.86364	0	2.2	380	114.6	63.3756
165	F167	13:52:59.981000	41548	Geonoma deversa	B4	5.1	0	0	10	59	119	A	50	51	0	0.85	144	12	1	0	0	0.208333	1	1	0	0	0.708333	1	1	0	0	0	0	1	0	0	0	0	14.8	RL	1	0	PP	1.45714	0	3.5	481	394.3	153.007
3	F03	12:54:59.962000	41492	Hyospathe elegans	E1	2.3	16	31	66	115	175	A	170	91	95	0.957895	94	4	1	0.5	0.875	1	1	1	0.5	0.875	1	1	1	0	0	0	0	0	0	0	0	0	0	M	0.32	0	PP	1.78462	73.2759	1.3	469	54.9	36.1014
179	F182	13:32:00.010000	41551	Hyospathe elegans	B5	1.7	0	0	7	56	116	A	280	32	180	0.177778	105	7	1	0	0	0	1	1	0	0	1	1	1	0	0	0	1	1	0	0	0	2	8	RL	0.32	0	PP	1.21429	164.706	1.4	481	348.5	100.935
180	F183	13:47:00.038000	41551	Hyospathe elegans	B5	1.6	0	0	7	56	116	A	200	65	162	0.401235	80	6	1	0	0	0.416667	1	1	0	0	0.416667	1	1	0	0	0	0	0	0	0	0	0	0	M	0.32	0	PP	0.533333	125	3	480	654.4	156.991
182	F185	14:10:59.981000	41551	Hyospathe elegans	B5	2.1	0	0	7	56	116	A	170	41	145	0.282759	97	8	1	0	0	0	1	1	0	0	1	1	1	0	0	0	1	1	0	0	0	56	46	RA	0.32	0	PP	1.5	80.9524	1.4	482	515.5	172.062
38	F38	16:02:00.038000	41506	Hyospathe elegans	D3	1.7	2	17	52	101	161	A	400	30	150	0.2	76	9	1	0.222222	0.388889	1	1	1	0.222222	0.388889	1	1	1	0	0	1	0	0	0	0	3	0	0	RM	0.32	0	PP	1.13333	235.294	1.5	481	609.6	120.366
39	F39	16:16:59.981000	41506	Hyospathe elegans	D3	1.3	2	17	52	101	161	A	400	33	156	0.211538	76	7	1	0.214286	0.5	1	1	1	0.214286	0.642857	1	1	1	0	0	0	0	0	0	0	0	0	0	M	0.32	0	PP	1	307.692	1.3	481	582	171.001
178	F181	16:16:00.019000	41548	Hyospathe elegans	B4	2.2	0	0	10	59	119	J	130	30	169	0.177515	95	11	1	0	0	0	1	1	0	0	1	1	1	0	0	0	1	0	0	0	0	69	0	RM	0.32	0	PP	1.69231	59.0909	1.3	480	196	74.6216
130	F132	18:31:59.981000	41534	Hyospathe elegans	B3	3.3	0	0	24	73	133	J	180	38	72	0.527778	80	10	0.8	0	0	0.4	0.9	0.8	0	0	0.4	0.9	0.8	0	0	0	0	0	0	0	0	0	0	V	0	0	PP	1.65	54.5455	2	468	539.1	129.792
47	F47	13:43:00.019000	41514	Hyospathe elegans	D5	1.6	0	9	44	93	153	A	160	26	92	0.282609	78	8	1	0	0.5	0.625	1	1	0	0.625	0.75	1	1	0	0	0	1	1	0	0	0	10	10.8	RB	0.32	0	PP	1.23077	100	1.3	480	567.2	144.189
73	F73	16:14:00.010000	41515	Hyospathe elegans	D2	1.6	0	8	43	92	152	A	240	34	164	0.207317	100	7	0.428571	0	0.214286	0.428571	1	0.428571	0	0.214286	0.428571	1	1	0	0	0	0	0	0	0	0	0	0	M	0.32	0	PP	1.06667	150	1.5	480	457.2	115.267
28	F28	14:03:59.990000	41506	Hyospathe elegans	D3	1.5	2	17	52	101	161	A	250	37	154	0.24026	85	7	1	0.142857	0.214286	0.714286	1	1	0.142857	0.214286	1	1	1	0	0	0	0	0	0	0	0	0	0	M	0.32	0	PP	1.5	166.667	1	481	670.6	140.059
98	F98	14:08:59.971000	41524	Hyospathe elegans	B1	1.6	0	0	34	83	143	J	170	62	130	0.476923	66	8	1	0	0	1	1	1	0	0	1	1	1	0	0	0	0	1	0	0	0	0	62.5	RB	0.32	0	PP	0.888889	106.25	1.8	487	566.4	132.458
176	F179	15:54:00	41548	Hyospathe elegans	B4	2	0	0	10	59	119	A	250	45	182	0.247253	90	8	1	0	0	0	1	1	0	0	1	1	1	0	0	0	1	0	0	0	0	52	0	RM	0.32	0	PP	1.33333	125	1.5	480	432.4	104.221
15	F15	15:04:00.019000	41500	Hyospathe elegans	E3	1.6	8	23	58	107	167	J	120	73.5	80	0.91875	74	9	1	0.944444	1	1	1	1	0.944444	1	1	1	1	0	0	0	0	0	0	0	0	0	0	M	0.32	0	PP	1	75	1.6	368	596.3	151.527
9	F09	13:39:59.962000	41500	Hyospathe elegans	E3	1.8	8	23	58	107	167	A	165	55	90	0.611111	83	6	1	0.583333	0.666667	1	1	1	0.583333	0.833333	1	1	1	0	0	0	0	3	0	0	0	0	5	RB	0.32	0	PP	0.473684	91.6667	3.8	361	94.5	57.4385
154	F156	14:37:00.019000	41535	Hyospathe elegans	B6	2.4	0	0	23	72	132	A	210	59	84	0.702381	75	8	1	0	0	1	1	1	0	0	1	1	1	0	0	0	0	0	0	0	0	0	0	M	0.32	0	PP	1.09091	87.5	2.2	480	727	140.729
10	F10	13:54:59.990000	41500	Hyospathe elegans	E3	1.4	8	23	58	107	167	A	280	58	163	0.355828	110	6	1	0.25	0.833333	1	1	1	0.25	0.833333	1	1	1	0	0	0	0	0	0	0	0	0	0	M	0.32	0	PP	1.07692	200	1.3	362	609.1	145.873
64	F64	14:32:00.038000	41515	Hyospathe elegans	D2	1.8	0	8	43	92	152	A	181	36	84	0.428571	63	8	1	0	0.875	1	1	1	0	0.875	1	1	1	0	0	0	1	2	0	0	0	18	26	RB	0.32	0	PP	1.125	100.556	1.6	483	502.4	99.249
11	F11	14:05:00.038000	41500	Hyospathe elegans	E3	1.9	8	23	58	107	167	A	210	48	155	0.309677	98	5	1	0.3	0.4	1	1	1	0.3	0.4	1	1	1	0	0	0	0	0	0	0	0	0	0	M	0.32	0	PP	1.1875	110.526	1.6	361	576.1	160.956
22	F22	16:34:59.981000	41500	Hyospathe elegans	E3	1.3	8	23	58	107	167	J	161	81	83	0.975904	73	10	1	0.85	1	1	1	1	0.85	1	1	1	1	0	0	0	0	0	0	0	0	0	0	M	0.32	0	PP	1	123.846	1.3	360	602.4	118.775
20	F20	16:09:59.990000	41500	Hyospathe elegans	E3	1.6	8	23	58	107	167	A	108	36	119	0.302521	79	10	1	0.35	0.45	1	1	1	0.35	0.45	1	1	1	0	0	0	0	0	0	0	0	0	0	M	0.32	0	PP	1.14286	67.5	1.4	361	435.8	85.8302
115	F116	14:03:59.990000	41530	Hyospathe elegans	B2	2.3	0	0	28	77	137	A	190	55	70	0.785714	69	8	1	0	0	1	1	1	0	0	1	1	1	0	0	0	1	1	0	0	0	11.5	15.5	RA	0.32	0	PP	1.4375	82.6087	1.6	480	528.7	82.9438
113	F114	13:43:00.019000	41530	Hyospathe elegans	B2	1.6	0	0	28	77	137	A	180	30	140	0.214286	100	6	1	0	0	0	0.417	0.42	0	0	0.416667	1	1	0	0	0	1	0	0	0	0	69	0	RM	0.32	0	PP	1.14286	112.5	1.4	480	674.7	125.703
153	F155	14:24:59.962000	41535	Hyospathe elegans	B6	2	0	0	23	72	132	A	205	40	107	0.373832	79	8	1	0	0	1	1	1	0	0	1	1	1	0	0	0	0	0	0	0	0	0	0	M	0.32	0	PP	1.42857	102.5	1.4	480	301.7	57.9925
111	F112	13:16:00.019000	41529	Hyospathe elegans	B1	2.1	0	0	29	78	138	A	180	67	144	0.465278	110	10	0.3	0	0	0	0.3	1	0	0	0.3	1	1	0	0	0	0	2	0	0	0	0	12	RB	0.32	0	PP	0.875	85.7143	2.4	484	80.8	39.9997
181	F184	15:58:00.019000	41551	Hyospathe elegans	B5	2	0	0	7	56	116	J	25	15	0	0.5	75	6	1	0	0	1	1	1	0	0	1	1	1	0	0	0	0	0	0	0	0	0	0	M	0.32	0	PP	1.53846	0	1.3	480	406.9	71.7892
[truncated: 58 more columns]

## Sheet: variables_colinear
Correlations
		das	htot	pestipe	compfolha	pfolha5	perda5	htotdas	dasdap	tmaxb	tmediab	sumtb	med180	tmaxg	sum180	tmediag	sumtg	incmed	incmax	vigor	das2	perda5_2	firefaixa	pestipe_2
das	Pearson Correlation	1	,375**	0.205923	,566**	-,550**	-,645**	-,383**	,680**	-0.000783611	-0.0547569	-0.00270775	0.00403018	0.0896786	0.00403407	0.114516	0.165855	0.0413346	0.0865595	0.089197	,982**	-,643**	0.071238	0.179137
	Sig. (2-tailed)		0.000787345	0.0723806	7.94355e-08	2.18392e-07	2.37492e-10	0.000585996	1.04538e-11	0.994603	0.636223	0.981354	0.97225	0.437974	0.972223	0.321343	0.149424	0.721145	0.454135	0.443532	5.16799e-56	2.87648e-10	0.538113	0.119032
	N	77	77	77	77	77	77	77	77	77	77	77	77	77	77	77	77	77	77	76	77	77	77	77
htot	Pearson Correlation	,375**	1	-0.0251821	,430**	-,351**	-,374**	,621**	0.210862	0.218038	0.0814934	0.146972	0.163338	,269*	0.163335	,355**	,368**	0.0274842	0.0504421	0.0761073	,352**	-,368**	0.150481	-0.0528024
	Sig. (2-tailed)	0.000787345		0.827903	9.6472e-05	0.00174128	0.000803806	1.717e-09	0.0656507	0.0567835	0.481073	0.202127	0.155784	0.0179781	0.155793	0.00155542	0.000985526	0.812445	0.663079	0.513472	0.00168328	0.000999807	0.191445	0.648333
	N	77	77	77	77	77	77	77	77	77	77	77	77	77	77	77	77	77	77	76	77	77	77	77
pestipe	Pearson Correlation	0.205923	-0.0251821	1	,352**	0.0761274	-0.011168	-,262*	0.0129255	-0.0660679	-0.0385398	-0.0340735	-0.0553402	,490**	-0.0553275	,438**	,423**	,550**	,610**	-0.0540552	0.163396	-0.0535433	-0.0556127	,972**
	Sig. (2-tailed)	0.0723806	0.827903		0.00168895	0.510509	0.923204	0.021247	0.911164	0.568077	0.739302	0.768614	0.632627	5.97584e-06	0.632705	6.79783e-05	0.000124628	2.18925e-07	3.76767e-09	0.642811	0.155635	0.643731	0.63095	9.71416e-49
	N	77	77	77	77	77	77	77	77	77	77	77	77	77	77	77	77	77	77	76	77	77	77	77
compfolha	Pearson Correlation	,566**	,430**	,352**	1	-0.198662	-,253*	-0.135513	,372**	-0.103921	-0.0928592	-0.0347875	-0.0406148	,275*	-0.0406035	,270*	,305**	,274*	,281*	-0.0829246	,512**	-,280*	-0.00748099	,311**
	Sig. (2-tailed)	7.94355e-08	9.6472e-05	0.00168895		0.0832652	0.0261547	0.239953	0.000849533	0.368425	0.421833	0.763905	0.725807	0.0155551	0.72588	0.0174546	0.0069545	0.0159126	0.0133529	0.476362	1.93436e-06	0.0138078	0.948514	0.00587548
	N	77	77	77	77	77	77	77	77	77	77	77	77	77	77	77	77	77	77	76	77	77	77	77
pfolha5	Pearson Correlation	-,550**	-,351**	0.0761274	-0.198662	1	,895**	0.0628957	-,349**	0.0211731	0.114874	0.0453243	0.0426384	0.0724824	0.0426408	0.0358796	-0.0108164	0.146465	0.177933	-0.133501	-,610**	,871**	0.0119576	0.0822445
	Sig. (2-tailed)	2.18392e-07	0.00174128	0.510509	0.0832652		5.34479e-28	0.586841	0.00184506	0.854975	0.319822	0.695491	0.712725	0.531018	0.71271	0.756719	0.925615	0.203705	0.121575	0.250267	3.77013e-09	6.55718e-25	0.917793	0.477026
	N	77	77	77	77	77	77	77	77	77	77	77	77	77	77	77	77	77	77	76	77	77	77	77
perda5	Pearson Correlation	-,645**	-,374**	-0.011168	-,253*	,895**	1	0.124392	-,401**	0.0789892	0.131626	0.0722229	0.0751246	0.04371	0.0751264	0.00913785	-0.0334714	0.117543	0.141011	-0.168579	-,703**	,979**	-0.00168068	0.0123769
	Sig. (2-tailed)	2.37492e-10	0.000803806	0.923204	0.0261547	5.34479e-28		0.281091	0.000307098	0.494696	0.25383	0.532494	0.516111	0.705831	0.516101	0.937133	0.772591	0.308631	0.221234	0.145468	1.0035e-12	7.01714e-54	0.988426	0.91492
	N	77	77	77	77	77	77	77	77	77	77	77	77	77	77	77	77	77	77	76	77	77	77	77
htotdas	Pearson Correlation	-,383**	,621**	-,262*	-0.135513	0.0628957	0.124392	1	-,272*	0.215537	0.0980282	0.11737	0.129173	0.137992	0.12916	,256*	,227*	-0.179662	-0.109671	0.110974	-,358**	0.1272	0.105934	-,273*
	Sig. (2-tailed)	0.000585996	1.717e-09	0.021247	0.239953	0.586841	0.281091		0.0166557	0.0597569	0.396343	0.30935	0.262864	0.231382	0.262913	0.0244791	0.0467807	0.117937	0.342373	0.339898	0.00139685	0.270286	0.35917	0.0161439
	N	77	77	77	77	77	77	77	77	77	77	77	77	77	77	77	77	77	77	76	77	77	77	77
dasdap	Pearson Correlation	,680**	0.210862	0.0129255	,372**	-,349**	-,401**	-,272*	1	-0.0651989	-0.14489	-0.101716	-0.100541	0.0149282	-0.100539	0.0467468	0.0924015	-0.0330834	-0.0237925	,255*	,651**	-,412**	0.00880027	0.0153151
	Sig. (2-tailed)	1.04538e-11	0.0656507	0.911164	0.000849533	0.00184506	0.000307098	0.0166557		0.573189	0.208663	0.37873	0.384289	0.897469	0.384297	0.686424	0.424134	0.775158	0.837266	0.0264832	1.49139e-10	0.000200063	0.939451	0.894827
	N	77	77	77	77	77	77	77	77	77	77	77	77	77	77	77	77	77	77	76	77	77	77	77
tmaxb	Pearson Correlation	-0.000783611	0.218038	-0.0660679	-0.103921	0.0211731	0.0789892	0.215537	-0.0651989	1	,719**	,745**	,818**	0.049721	,818**	0.0472304	0.0512736	0.0549436	-0.0282541	0.0513881	-0.00608839	0.0388844	,691**	-0.0891297
	Sig. (2-tailed)	0.994603	0.0567835	0.568077	0.368425	0.854975	0.494696	0.0597569	0.573189		1.87758e-13	7.47578e-15	1.11532e-19	0.667611	1.11623e-19	0.683351	0.65787	0.635071	0.807291	0.659316	0.958089	0.737056	3.52747e-12	0.440794
	N	77	77	77	77	77	77	77	77	77	77	77	77	77	77	77	77	77	77	76	77	77	77	77
tmediab	Pearson Correlation	-0.0547569	0.0814934	-0.0385398	-0.0928592	0.114874	0.131626	0.0980282	-0.14489	,719**	1	,920**	,938**	0.168735	,938**	0.130899	0.06539	0.219752	0.140285	0.116037	-0.0625474	0.120301	,838**	-0.0575944
	Sig. (2-tailed)	0.636223	0.481073	0.739302	0.421833	0.319822	0.25383	0.396343	0.208663	1.87758e-13		3.10101e-32	3.51337e-36	0.142385	3.51538e-36	0.256486	0.572064	0.0548175	0.223646	0.318184	0.588919	0.297335	1.96867e-21	0.618811
	N	77	77	77	77	77	77	77	77	77	77	77	77	77	77	77	77	77	77	76	77	77	77	77
sumtb	Pearson Correlation	-0.00270775	0.146972	-0.0340735	-0.0347875	0.0453243	0.0722229	0.11737	-0.101716	,745**	,920**	1	,977**	,229*	,977**	0.191004	0.215861	,267*	0.162884	0.0761775	-0.0102336	0.0530333	,892**	-0.0561424
	Sig. (2-tailed)	0.981354	0.202127	0.768614	0.763905	0.695491	0.532494	0.30935	0.37873	7.47578e-15	3.10101e-32		8.4614e-52	0.0455521	8.44482e-52	0.0961133	0.0593641	0.0188376	0.156954	0.513083	0.929612	0.646898	1.24369e-27	0.627696
	N	77	77	77	77	77	77	77	77	77	77	77	77	77	77	77	77	77	77	76	77	77	77	77
med180	Pearson Correlation	0.00403018	0.163338	-0.0553402	-0.0406148	0.0426384	0.0751246	0.129173	-0.100541	,818**	,938**	,977**	1	0.196677	1,000**	0.160632	0.163352	,241*	0.146826	0.0879877	-0.00227721	0.0545474	,879**	-0.083412
	Sig. (2-tailed)	0.97225	0.155784	0.632627	0.725807	0.712725	0.516111	0.262864	0.384289	1.11532e-19	3.51337e-36	8.4614e-52		0.0864561	0	0.162845	0.155749	0.0351227	0.202579	0.449761	0.984318	0.637517	9.01255e-26	0.470772
	N	77	77	77	77	77	77	77	77	77	77	77	77	77	77	77	77	77	77	76	77	77	77	77
tmaxg	Pearson Correlation	0.0896786	,269*	,490**	,275*	0.0724824	0.04371	0.137992	0.0149282	0.049721	0.168735	,229*	0.196677	1	0.196698	,970**	,935**	,840**	,858**	-0.0314239	0.0599042	0.0396367	0.158471	,482**
	Sig. (2-tailed)	0.437974	0.0179781	5.97584e-06	0.0155551	0.531018	0.705831	0.231382	0.897469	0.667611	0.142385	0.0455521	0.0864561		0.0864217	1.24695e-47	1.32617e-35	1.45725e-21	2.27905e-23	0.787565	0.60479	0.732158	0.168652	9.25411e-06
	N	77	77	77	77	77	77	77	77	77	77	77	77	77	77	77	77	77	77	76	77	77	77	77
sum180	Pearson Correlation	0.00403407	0.163335	-0.0553275	-0.0406035	0.0426408	0.0751264	0.12916	-0.100539	,818**	,938**	,977**	1,000**	0.196698	1	0.160647	0.163368	,241*	0.146845	0.0879819	-0.002273	0.0545496	,879**	-0.0833967
	Sig. (2-tailed)	0.972223	0.155793	0.632705	0.72588	0.71271	0.516101	0.262913	0.384297	1.11623e-19	3.51538e-36	8.44482e-52	0	0.0864217		0.162806	0.155708	0.0350983	0.20252	0.449791	0.984347	0.637503	9.02368e-26	0.470854
	N	77	77	77	77	77	77	77	77	77	77	77	77	77	77	77	77	77	77	76	77	77	77	77
tmediag	Pearson Correlation	0.114516	,355**	,438**	,270*	0.0358796	0.00913785	,256*	0.0467468	0.0472304	0.130899	0.191004	0.160632	,970**	0.160647	1	,963**	,708**	,775**	0.0223108	0.0867927	0.00353813	0.169505	,417**
	Sig. (2-tailed)	0.321343	0.00155542	6.79783e-05	0.0174546	0.756719	0.937133	0.0244791	0.686424	0.683351	0.256486	0.0961133	0.162845	1.24695e-47	0.162806		1.19074e-44	6.10449e-13	1.34394e-16	0.84829	0.452915	0.975637	0.140545	0.000163419
	N	77	77	77	77	77	77	77	77	77	77	77	77	77	77	77	77	77	77	76	77	77	77	77
sumtg	Pearson Correlation	0.165855	,368**	,423**	,305**	-0.0108164	-0.0334714	,227*	0.0924015	0.0512736	0.06539	0.215861	0.163352	,935**	0.163368	,963**	1	,692**	,729**	0.00257126	0.136077	-0.0427518	0.188266	,405**
	Sig. (2-tailed)	0.149424	0.000985526	0.000124628	0.0069545	0.925615	0.772591	0.0467807	0.424134	0.65787	0.572064	0.0593641	0.155749	1.32617e-35	0.155708	1.19074e-44		3.24603e-12	5.68321e-14	0.982413	0.237986	0.711995	0.101067	0.000258092
	N	77	77	77	77	77	77	77	77	77	77	77	77	77	77	77	77	77	77	76	77	77	77	77
incmed	Pearson Correlation	0.0413346	0.0274842	,550**	,274*	0.146465	0.117543	-0.179662	-0.0330834	0.0549436	0.219752	,267*	,241*	,840**	,241*	,708**	,692**	1	,850**	-0.0850442	0.00899641	0.116322	0.115662	,572**
	Sig. (2-tailed)	0.721145	0.812445	2.18925e-07	0.0159126	0.203705	0.308631	0.117937	0.775158	0.635071	0.0548175	0.0188376	0.0351227	1.45725e-21	0.0350983	6.10449e-13	3.24603e-12		1.3983e-22	0.465124	0.938104	0.313716	0.316491	5.59832e-08
	N	77	77	77	77	77	77	77	77	77	77	77	77	77	77	77	77	77	77	76	77	77	77	77
incmax	Pearson Correlation	0.0865595	0.0504421	,610**	,281*	0.177933	0.141011	-0.109671	-0.0237925	-0.0282541	0.140285	0.162884	0.146826	,858**	0.146845	,775**	,729**	,850**	1	-0.101419	0.0408866	0.137607	0.0363026	,608**
	Sig. (2-tailed)	0.454135	0.663079	3.76767e-09	0.0133529	0.121575	0.221234	0.342373	0.837266	0.807291	0.223646	0.156954	0.202579	2.27905e-23	0.20252	1.34394e-16	5.68321e-14	1.3983e-22		0.383344	0.724045	0.232701	0.753941	4.4499e-09
	N	77	77	77	77	77	77	77	77	77	77	77	77	77	77	77	77	77	77	76	77	77	77	77
vigor	Pearson Correlation	0.089197	0.0761073	-0.0540552	-0.0829246	-0.133501	-0.168579	0.110974	,255*	0.0513881	0.116037	0.0761775	0.0879877	-0.0314239	0.0879819	0.0223108	0.00257126	-0.0850442	-0.101419	1	0.125386	-0.152084	0.215007	-0.0562106
	Sig. (2-tailed)	0.443532	0.513472	0.642811	0.476362	0.250267	0.145468	0.339898	0.0264832	0.659316	0.318184	0.513083	0.449761	0.787565	0.449791	0.84829	0.982413	0.465124	0.383344		0.280482	0.189687	0.0621538	0.629598
	N	76	76	76	76	76	76	76	76	76	76	76	76	76	76	76	76	76	76	76	76	76	76	76
das2	Pearson Correlation	,982**	,352**	0.163396	,512**	-,610**	-,703**	-,358**	,651**	-0.00608839	-0.0625474	-0.0102336	-0.00227721	0.0599042	-0.002273	0.0867927	0.136077	0.00899641	0.0408866	0.125386	1	-,686**	0.0569823	0.138433
	Sig. (2-tailed)	5.16799e-56	0.00168328	0.155635	1.93436e-06	3.77013e-09	1.0035e-12	0.00139685	1.49139e-10	0.958089	0.588919	0.929612	0.984318	0.60479	0.984347	0.452915	0.237986	0.938104	0.724045	0.280482		5.83064e-12	0.62255	0.229882
	N	77	77	77	77	77	77	77	77	77	77	77	77	77	77	77	77	77	77	76	77	77	77	77
perda5_2	Pearson Correlation	-,643**	-,368**	-0.0535433	-,280*	,871**	,979**	0.1272	-,412**	0.0388844	0.120301	0.0530333	0.0545474	0.0396367	0.0545496	0.00353813	-0.0427518	0.116322	0.137607	-0.152084	-,686**	1	-0.0266323	-0.0214579
	Sig. (2-tailed)	2.87648e-10	0.000999807	0.643731	0.0138078	6.55718e-25	7.01714e-54	0.270286	0.000200063	0.737056	0.297335	0.646898	0.637517	0.732158	0.637503	0.975637	0.711995	0.313716	0.232701	0.189687	5.83064e-12		0.818157	0.853046
	N	77	77	77	77	77	77	77	77	77	77	77	77	77	77	77	77	77	77	76	77	77	77	77
firefaixa	Pearson Correlation	0.071238	0.150481	-0.0556127	-0.00748099	0.0119576	-0.00168068	0.105934	0.00880027	,691**	,838**	,892**	,879**	0.158471	,879**	0.169505	0.188266	0.115662	0.0363026	0.215007	0.0569823	-0.0266323	1	-0.108991
	Sig. (2-tailed)	0.538113	0.191445	0.63095	0.948514	0.917793	0.988426	0.35917	0.939451	3.52747e-12	1.96867e-21	1.24369e-27	9.01255e-26	0.168652	9.02368e-26	0.140545	0.101067	0.316491	0.753941	0.0621538	0.62255	0.818157		0.345392
	N	77	77	77	77	77	77	77	77	77	77	77	77	77	77	77	77	77	77	76	77	77	77	77
pestipe_2	Pearson Correlation	0.179137	-0.0528024	,972**	,311**	0.0822445	0.0123769	-,273*	0.0153151	-0.0891297	-0.0575944	-0.0561424	-0.083412	,482**	-0.0833967	,417**	,405**	,572**	,608**	-0.0562106	0.138433	-0.0214579	-0.108991	1
	Sig. (2-tailed)	0.119032	0.648333	9.71416e-49	0.00587548	0.477026	0.91492	0.0161439	0.894827	0.440794	0.618811	0.627696	0.470772	9.25411e-06	0.470854	0.000163419	0.000258092	5.59832e-08	4.4499e-09	0.629598	0.229882	0.853046	0.345392
	N	77	77	77	77	77	77	77	77	77	77	77	77	77	77	77	77	77	77	76	77	77	77	77
**. Correlation is significant at the 0.01 level (2-tailed).
*. Correlation is significant at the 0.05 level (2-tailed).
